## Title page

**Title: Multimorbidity and its associated risk factors among the older adults in India**

### Author 1

**Mohd Rashid Khan**

**Affiliations: Research Fellow Department of Health Government of Mizoram**

**Email: [mrk92195@gmail.com](mailto:mrk92195@gmail.com)**

### Author 2

Manzoor Ahmad Malik

**Affiliations:**

Research Fellow Department of Humanities and social sciences, Indian Institute of Technology (IIT), Roorkee, Haridwar, India.

**Email: [munzirmalik@yahoo.com](mailto:munzirmalik@yahoo.com)**

### Author 3

Saddaf Naaz Akhtar, (M.Phil.)

**Affiliations:**

Centre for the Study of Regional Development, School of Social Sciences, Jawaharlal Nehru University, new Delhi, India-110067

**Email: [sadafdpsjr@gmail.com](mailto:sadafdpsjr@gmail.com)**

### Author 4

**Dr Suryakant Yadav**

**Affiliations:**

**Assistant Professor**

Department of Development studies International Institute for Population Studies Mumbai

**Email: [suryakant11@gmail.com](mailto:suryakant11@gmail.com)**

### **Corresponding author:**

Saddaf Naaz Akhtar, (Doctoral Fellow)

### **Affiliations:**

Centre for the Study of Regional Development, School of Social Sciences,  
Jawaharlal Nehru University, new Delhi, India-110067

**Email:** [sadafdpsjr@gmail.com](mailto:sadafdpsjr@gmail.com)

### **Declarations**

#### **Acknowledgements**

No acknowledgements

#### **Funding**

No funding was received to carry out this work

#### **Contributions**

We declare that the each of us made a significant contribution to carry out this work

#### **Declaration of interest statement**

We know of no conflicts of interest associated with this publication, and there has been no significant financial support for this work that could have influenced its outcome.

#### **Data Availability**

The LASI Wave-1 data was collected by the nodal institution International Institute for Population Sciences, Mumbai on behalf of the Ministry of Health and Family Welfare, Government of India. All data were de-identified. The de-identified version of the LASI Wave-1 data is publicly available to the researchers and policymakers upon formal request to the International Institute For Population Sciences for access (link to the data request document [LASI DataRequestForm\\_0.pdf \(iipsindia.ac.in\)](#)) and link for the other information for lasi data set [LASI Wave-I | International Institute for Population Sciences \(IIPS\) \(iipsindia.ac.in\)](#).

## **Abstract**

Health at older ages is a key public health challenge especially among the developing countries. Older adults are at greater risk of vulnerability due to their physical and functional health risks. With rapidly rising ageing population and increasing burden of non-communicable diseases elderly in India are at a greater risk for multi-morbidities. Therefore, to understand this multimorbidity transition and its determinants we used a sample of older Indian adults to examine multimorbidity and its associated risk factors among the Indian elderly aged 45 and above. Using the sample of 72250 older adults this study employed the multiple regression analysis to study the risk factors of multimorbidity. Multimorbidity was computed based on the assumption of elderly having one or more than one of the diseases risks. Our results confirm the emerging diseases burden among the older adults in India. One of the significant findings of the study was the contrasting prevalence of multimorbidity among the wealthiest groups, which diverges from some earlier studies in developing countries examining the multimorbidity. Thus, given the contrasting results and rise of multimorbidity among older adults India, there is paper argues for an immediate need for proper policy measures and health system strengthening to ensure the better health of older adults in India.

**Keywords:** Multimorbidity, older adults, Epidemiological transition, Health, Diseases burden

## Highlights

- Multimorbidity is emerging as key challenge especially in the developing countries.
- There is a significant association between multimorbidity and its associated demographic and socio-economic key risk factors.
- Contrasting prevalence of multimorbidity among the affluent groups as compared to earlier studies.
- Increasing longevity has significant consequences on morbidity pattern of older adult requiring an immediate policy attention to avert the challenges of morbidity, disability and death at older ages.

## **Introduction**

India is witnessing an unprecedented change in the demographic and social structure in the recent decades. India is experiencing an epidemiological transition which witnesses a rising burden of noncommunicable diseases (NCDs) (Quigley 2006; Agrawal and Arokiasamy 2010, Yadav and Arokiasamy 2014). NCDs are rapidly increasing in India mainly because of lifestyle changes<sup>2</sup>. With the ageing of population in India, which has now become a challenge for public health experts, policymakers, and other research organizations<sup>3-5</sup>, increasing prevalence of senility is a concern in India with the rise of NCDs. There is an urgent need to understand the burden of chronic health conditions among elderly Indians, in order to improve and develop suitable responses for the future requirements of healthcare services.

Increase in longevity and decrease in mortality leads to increase the multiple comorbid conditions which is commonly known as 'Multimorbidity'. In other words, Multimorbidity is defined as the coexistence of two or more chronic conditions which have become prevalent widely<sup>6,7</sup>. Multimorbidity has now emerged as major public health issues worldwide and its associated greater adverse outcome of health like- disability, mortality, poor quality of life, hospitalizations, consequent use of medical resources and health expenditure<sup>8-11</sup>.

Literatures suggests that elderly are at larger health risk due to multiple chronic diseases<sup>5,7,11-13</sup>. A systematic review study has revealed that prevalence of multimorbidity among the elderly were found to be more than 55% in different countries<sup>14</sup>. Despite that, high multimorbidity prevalence have been observed in many developed nations, for instance- United states, Australia<sup>13</sup>, Canada<sup>15</sup> & Europe<sup>9,12,16</sup>. Interestingly, the elderly from developing nations are inadequately equipped with the multimorbidity challenge, as a result a study conducted in Vietnam<sup>17</sup> revealed that more than 40% of elderly had multimorbidity conditions, whereas 69% in China<sup>11</sup> and 52% in Bangladesh<sup>18</sup>. Besides that, the least developed country like Tanzania showed 25.3% multimorbidity prevalence among the elderly population.

## **Multimorbidity in Indian settings**

Multimorbidity research in India among the elderly is still at early stage. About 23.3% multimorbidity prevalence has been observed in India in the previous study conducted in 2017

where Kerala showed the highest prevalence of multimorbidity with 42% followed by Punjab (36%), Maharashtra (24%) & West Bengal (23%)<sup>19</sup>. A recent study conducted in the district of Kerala showed 45.4% multimorbidity prevalence<sup>20</sup>. Around 44% multimorbidity prevalence was found in West Bengal<sup>21</sup>. A recent study conducted in Allahabad district of Uttar Pradesh showed 31% prevalence of multimorbidity<sup>22</sup>.

Works of literature has suggested that there exists a strong positive association between age and the prevalence of multimorbidity in India<sup>19,23-25</sup>. A study conducted in Odisha<sup>26</sup> has revealed that multimorbidity prevalence were higher among women than men and similar results have been also found in West Bengal<sup>21</sup>. The rich elderly group in India were more likely to have poor health due to long term multimorbidity conditions<sup>27</sup>. Recent studies have revealed that there exists significant associations between obesity<sup>28</sup> and loneliness<sup>29</sup> accompanied with multimorbidity in India. Another recent study has investigated in Odisha that multimorbidity increases the odds of elderly abuse<sup>30</sup>. There are very few studies that exists on the multimorbidity prevalence and its associated risk factors among the elderly in India. Therefore, we aim to examine the prevalence of multimorbidity among the elderly in India and its states and, we examine its associated risk factors.

## **Methods**

### ***Data source***

The data for this study has been taken from Longitudinal Ageing Study in India (LASI) Wave 1, which was carried out during 2017-18. LASI is a multidisciplinary, internationally harmonized panel study of 72,250 older adults aged 45 and above including their spouses less than 45 years, representative to India and all of its states and union territories (excluding Sikkim). It is a baseline data of India's first longitudinal ageing study that provides comprehensive scientific evidence base on demographics, household economic status, chronic health conditions, symptom-based health conditions, functional health, mental health (cognition and depression), biomarkers, health insurance and healthcare utilization, family and social networks, social welfare programs, work and employment, retirement, satisfaction, and life expectations.

## **Analytical sample**

### ***Outcome variables***

The outcome variable in the study is multimorbidity which was measured on the basis of multiple chronic diseases reported among the older adults surveyed. Respondents were asked about 10 various diseases (See supplementary file) from which the outcome variable of this study was computed. These responses were combined together into trichotomous variable with categories (0= No), (1= single) and (2=more than one morbidity) to study the prevalence. But for regression analysis we converted the variable into two categories where '0' represented no morbidity and '1' denotes multimorbidity to apply the logistic model in the study.

### ***Independent variables***

Demographic and socio-economic risk factors included in the study, such as age, gender, residence, level of education, health insurance status, MPCE Quintiles, caste-group, religion, currently working, marital status (See supplemental file).

### ***Statistical analysis***

We used frequencies, percentages and cross tabulations for prevalence of multimorbidity with respect to the social and demographic characteristics with 95% confidence interval. We applied chi-square test ( $\chi^2$ ) to see the association between multimorbidity and its covariates. We then performed the logistic regression to study the determinants of multimorbidity among older adults in India

## **Results**

### ***Socio-demographic characteristics***

The socio-economic and demographic characteristics of the study population by the number of diseases are presented in **Table 1**. The mean number of illnesses per year caused by single disease in the sample was 2.58 (SD = 2.19) with 18.75% (95% CI 18.16% - 19.36%), whereas it was 62.68% (95% CI 61.9% - 63.45%) for more than one disease, i.e., multimorbidity.

### ***Multimorbidity prevalence at national level***

Table 2 shows the prevalence of multimorbidity increased substantially with age, from 44.69% (95% CI = 39.3% - 50.22%) in  $\geq 40$  years to 74.12% (95% CI = 70.43% - 77.5%) in those aged above 80 years. Similarly, the crude prevalence of multimorbidity increased modestly with increasing household wealth, from 53.78% (95% CI = 52.32% - 55.23%) in the lowest wealth quintile to 71.97% (95% CI = 70.02% - 73.84%) in the highest wealth quintile. There is considerably higher prevalence of multimorbidity in urban 69.59% (95% CI = 67.66% - 71.45%) against rural area 59.48% (95% CI = 58.79% - 60.17%). There seems not much difference in male and female as far as multimorbidity is concern, however, widowed has higher prevalence of multimorbidity 69.51% (95% CI = 67.98% - 71.00%) compare to currently married 60.92% (95% CI = 60.04% - 61.78%).

### ***Single & multimorbidity prevalence at state level***

**Map 1** shows the single morbidity prevalence among the elderly in India at state level using LASI Wave-1 data. The highest single morbidity prevalence was in Odisha (24.4%), followed by Assam (23.2%), Chhattisgarh (23%) & Tamil Nadu (22%) whereas the lowest were seen in Punjab (10.9%), and followed by Kerala (13.4%), Meghalaya (14%) & Chandigarh (14%). **Map 2** indicates the multimorbidity prevalence among the elderly in India at state level. The prevalence of multimorbidity was the highest in Punjab (83%), Chandigarh (78.7%), Kerala (78%), West Bengal (73.4%), & Goa (72.5%) while the lowest were found in Nagaland with 42.6%, followed by Chhattisgarh (44.6%), Meghalaya (48.8%), Odisha (49.4%) & Jharkhand (51.5%).

### ***Determinants of Multimorbidity***

Multimorbidity is common at higher ages given the associated risk of physical and functional vulnerability. There are numerous other risk factors like smoking drinking, underweight obesity, physical limitations and occupational exposures that are likely to enhance the risk for multimorbidity. Multivariate associations between population characteristics and multimorbidity



are presented in Table 2. The predicted probability of having a multiple disease showed a significant increase, and it is almost 5 times more likely in 71-80 years (Adjusted OR=5.033; 95% CI = 4.553 - 5.564; reference category  $\geq 40$  years of age). Women were more likely than men to have more than one morbidity (Adjusted OR=1.354; 95% CI = 1.296 - 1.416). Other characteristics like urban resident (OR= 1.406; 95% CI = 1.355 - 1.460) with reference to rural, Muslim (AOR= 1.322; 95% CI = 1.250 - 1.398) against Hindu, currently working (AOR= 1.436; 95% CI = 1.373 - 1.503), ever consumed any alcoholic beverages (AOR= 1.198; 95% CI = 1.142 - 1.257) and widowed (AOR= 1.062; 95% CI = 1.014 - 1.113) against currently married have higher likelihood of having multimorbidity. The lower caste categories SC (AOR= 0.891; 95% CI = 0.845 - 0.940), ST (AOR= 0.568; 95% CI = 0.537 - 0.601) and OBC (AOR= 0.861; 95% CI = 0.825 - 0.899) are less likely of having multimorbidity compared with the people in Other (Upper Hindu caste) category.

## Discussion

Multimorbidity is emerging as a critical public health challenges, especially, in the developing countries such as India. Owing to the life style changes and shift in disease pattern and rise in out-of-pocket expenditure (OOPE), multimorbidity is resulting into an economic burden for countries. In parallel to the rise in multimorbidity, ageing of population with increase in life expectancy has become a major public health challenge. The ageing of population further manifests the multifold vulnerability in old ages caused by these diseases' risks. In the view to rise in risk of diseases, we examined the prevalence and risk factors of multimorbidity in 45 and above years using data provided in the LASI wave-1 in India.

An individual suffers from multimorbidity due to multiple reasons ranging from comorbidities that may arise due to a common risk factor or due to the outcome of a particular diseases leading to other diseases<sup>31</sup>. This risk likely enhances with age due to physical and functional vulnerabilities. Research shows ageing contributes to multimorbidity through the loss of physical and functional health including frailty, which later results into greater complications like falls, disability, immobility, and mortality<sup>32,33</sup>.

Our results showed the significant association between multimorbidity and its associated demographic and socio-economic risk factors like age, income, education and place of residence. The results corroborate with the earlier findings where significant association was found between multimorbidity and socio-economic outcomes<sup>34</sup>.

This study showed the significant and positive relation of multimorbidity in urban areas. The risk associated with multimorbidity is higher in 45 and above years in urban areas as compared to rural areas. This higher risk in urban areas is likely attributable to increasing life style changes<sup>35</sup>. This higher risk of disease in urban areas is also appreciated due to the imbalance in medical care that exists in weak health care facilities<sup>36</sup>.

One of the significant findings of this paper is the contrasting prevalence of multimorbidity among the most wealthiest groups, which diverges from some earlier studies from developing countries examining the multimorbidity<sup>37,38</sup>. One of the most likely reasons maybe self-reporting of morbidity given the fact that elderly belonging to better socio-economic classes have greater access to health care service provisions, which increases the likelihood of their diagnosis and care for a particular diseases<sup>39</sup>.

Multimorbidity increases likely to ageing risk as shown by various studies<sup>33,40</sup>. These findings are also well reflected through our results where increase in age likely enhances the risk for more than one morbidity. Therefore, increasing longevity has a likely consequences of morbidity pattern of older adults, which needs an immediate policy attention to avert the challenges of morbidity, disability and death at older ages. Furthermore, strong measures can ensure the active and healthy ageing interventions to avert the diseases burden with greater concentration of older adults in upper ages.

## **Conclusions**

This study provides an evidence of emerging diseases burden among the older adults in India. The study highlights the need for better interventions for older adults to avert the health crisis in later years of life. As the findings of this research specifically indicate the growing burden of multimorbidity, there is an immediate need for proper policy measures and health system strengthening to ensure the health ageing in India. Moreover emphasis should be given on

workforce training and quality improvement strategies which can ensure the better physical and functional health of older adults. There is also an immediate need for improving the financial incentives for elderly at older ages given the challenges they face in terms of health and social security provisions in India.

## Reference:

1. Agrawal G, Arokiasamy P. Morbidity Prevalence and Health Care Utilization Among Older Adults in India. *J Appl Gerontol* [Internet]. 2010 Apr [cited 2021 Jun 24];29(2):155–79. Available from: <http://journals.sagepub.com/doi/10.1177/0733464809339622>
2. Quigley MA. Commentary: Shifting burden of disease—epidemiological transition in India. *International Journal of Epidemiology* [Internet]. 2006 Dec 1 [cited 2021 Aug 29];35(6):1530–1. Available from: <http://academic.oup.com/ije/article/35/6/1530/660159/Commentary-Shifting-burden-of>
3. Abegunde DO, Mathers CD, Adam T, Ortegon M, Strong K. The burden and costs of chronic diseases in low-income and middle-income countries. *The Lancet* [Internet]. 2007 Dec [cited 2021 Aug 29];370(9603):1929–38. Available from: <https://linkinghub.elsevier.com/retrieve/pii/S0140673607616961>
4. Akhtar SN, Saikia N. Differentials and predictors of hospitalization among the elderly people in India: Evidence from 75<sup>th</sup> round of National Sample Survey (2017-18) [Internet]. *Public and Global Health*; 2021 Aug [cited 2021 Aug 29]. Available from: <http://medrxiv.org/lookup/doi/10.1101/2021.08.25.21262606>
5. Arokiasamy P, Uttamacharya U, Jain K, Biritwum RB, Yawson AE, Wu F, et al. The impact of multimorbidity on adult physical and mental health in low- and middle-income countries: what does the study on global ageing and adult health (SAGE) reveal? *BMC Med* [Internet]. 2015 Dec [cited 2021 Aug 29];13(1):178. Available from: <http://bmcmedicine.biomedcentral.com/articles/10.1186/s12916-015-0402-8>
6. Johnston LD, O'Malley PM, Miech RA, Bachman JG, Schilenberg JE. Monitoring the future national results on drug use: 1975-2013: Overview, key findings on adolescent drug use.

- [Internet]. Institute for Social Research, The University of Michigan; 2014 [cited 2020 Nov 4]. Available from: <https://deepblue.lib.umich.edu/bitstream/handle/2027.42/137913/mtf-overview2014.pdf?sequence=1&isAllowed=y>
7. Salive ME. Multimorbidity in Older Adults. *Epidemiologic Reviews* [Internet]. 2013 Jan 1 [cited 2021 Aug 29];35(1):75–83. Available from: <https://academic.oup.com/epirev/article-lookup/doi/10.1093/epirev/mxs009>
  8. Bähler C, Huber CA, Brüngger B, Reich O. Multimorbidity, health care utilization and costs in an elderly community-dwelling population: a claims data based observational study. *BMC Health Serv Res* [Internet]. 2015 Dec [cited 2021 Aug 29];15(1):23. Available from: <http://bmchealthservres.biomedcentral.com/articles/10.1186/s12913-015-0698-2>
  9. Garin N, Olaya B, Moneta MV, Miret M, Lobo A, Ayuso-Mateos JL, et al. Impact of Multimorbidity on Disability and Quality of Life in the Spanish Older Population. Glymour MM, editor. *PLoS ONE* [Internet]. 2014 Nov 6 [cited 2021 Aug 29];9(11):e111498. Available from: <https://dx.plos.org/10.1371/journal.pone.0111498>
  10. McPhail S. Multimorbidity in chronic disease: impact on health care resources and costs. *RMHP* [Internet]. 2016 Jul [cited 2021 Aug 29];Volume 9:143–56. Available from: <https://www.dovepress.com/multimorbidity-in-chronic-disease-impact-on-health-care-resources-and-peer-reviewed-article-RMHP>
  11. Zhang L, Ma L, Sun F, Tang Z, Chan P. A Multicenter Study of Multimorbidity in Older Adult Inpatients in China. *J Nutr Health Aging* [Internet]. 2020 Mar [cited 2021 Aug 29];24(3):269–76. Available from: <http://link.springer.com/10.1007/s12603-020-1311-x>
  12. Bezerra de Souza DL, Oliveras-Fabregas A, Espelt A, Bosque-Prous M, de Camargo Cancela M, Teixidó-Compañó E, et al. Multimorbidity and its associated factors among adults aged 50 and over: A cross-sectional study in 17 European countries. Devleesschauwer B, editor. *PLoS ONE* [Internet]. 2021 Feb 11 [cited 2021 Aug 29];16(2):e0246623. Available from: <https://dx.plos.org/10.1371/journal.pone.0246623>

13. Walker AE. Multiple chronic diseases and quality of life: patterns emerging from a large national sample, Australia. *Chronic Illness* [Internet]. 2007 Sep [cited 2021 Aug 29];3(3):202–18. Available from: <http://journals.sagepub.com/doi/10.1177/1742395307081504>
14. Marengoni A, Angleman S, Melis R, Mangialasche F, Karp A, Garmen A, et al. Aging with multimorbidity: A systematic review of the literature. *Ageing Research Reviews* [Internet]. 2011 Sep [cited 2021 Aug 29];10(4):430–9. Available from: <https://linkinghub.elsevier.com/retrieve/pii/S1568163711000249>
15. Geda NR, Janzen B, Pahwa P. Chronic disease multimorbidity among the Canadian population: prevalence and associated lifestyle factors. *Arch Public Health* [Internet]. 2021 Dec [cited 2021 Aug 29];79(1):60. Available from: <https://archpublichealth.biomedcentral.com/articles/10.1186/s13690-021-00583-7>
16. Willadsen TG, Bebe A, Køster-Rasmussen R, Jarbøl DE, Guassora AD, Waldorff FB, et al. The role of diseases, risk factors and symptoms in the definition of multimorbidity – a systematic review. *Scandinavian Journal of Primary Health Care* [Internet]. 2016 Apr 2 [cited 2021 Aug 29];34(2):112–21. Available from: <https://www.tandfonline.com/doi/full/10.3109/02813432.2016.1153242>
17. Ha NT, Le NH, Khanal V, Moorin R. Multimorbidity and its social determinants among older people in southern provinces, Vietnam. *Int J Equity Health* [Internet]. 2015 Dec [cited 2021 Aug 29];14(1):50. Available from: <https://equityhealthj.biomedcentral.com/articles/10.1186/s12939-015-0177-8>
18. Khanam MA, Streatfield PK, Kabir ZN, Qiu C, Cornelius C, Wahlin Å. Prevalence and Patterns of Multimorbidity among Elderly People in Rural Bangladesh: A Cross-sectional Study. *J Health Popul Nutr* [Internet]. 2011 Aug 23 [cited 2021 Aug 29];29(4):406–14. Available from: <http://www.banglajol.info/bd/index.php/JHPN/article/view/8458>
19. Talukdar B, Himanshu. Prevalence of Multimorbidity (Chronic NCDS) and Associated Determinants Among Elderly in India. *Demography India* [Internet]. 2017 Jan [cited 2021 Aug 29];(Special Issue (2017)):69–76. Available from: [https://www.researchgate.net/publication/324015609\\_Prevalence\\_of\\_Multimorbidity\\_Chronic\\_NCDS\\_and\\_Associated\\_Determinants\\_Among\\_Elderly\\_in\\_India](https://www.researchgate.net/publication/324015609_Prevalence_of_Multimorbidity_Chronic_NCDS_and_Associated_Determinants_Among_Elderly_in_India)

20. C R, Jeemon P. Prevalence and patterns of multi-morbidity in the productive age group of 30-69 years: A cross-sectional study in Pathanamthitta District, Kerala. Wellcome Open Res [Internet]. 2020 Dec 15 [cited 2021 Aug 29];5:233. Available from: <https://wellcomeopenresearch.org/articles/5-233/v2>
21. Vadrevu L, Kumar V, Kanjilal B. Rising challenge of multiple morbidities among the rural poor in India&#151;a case of the Sundarbans in West Bengal. Int J Med Sci Public Health [Internet]. 2016 [cited 2021 Aug 29];5(2):343. Available from: <http://www.scopemed.org/fulltextpdf.php?mno=200084>
22. Verma V, Mishra N. A Study on Multi-morbidity among Geriatric Group in a District of Northern India: A Cross Sectional Study. IJMEDPH [Internet]. 2019 Dec 5 [cited 2021 Aug 29];9(4):137–40. Available from: <https://www.ijmedph.org/article/659>
23. Banjare P, Pradhan J. Socio-Economic Inequalities in the Prevalence of Multi-Morbidity among the Rural Elderly in Bargarh District of Odisha (India). Chaturvedi S, editor. PLoS ONE [Internet]. 2014 Jun 5 [cited 2021 Aug 29];9(6):e97832. Available from: <https://dx.plos.org/10.1371/journal.pone.0097832>
24. Britt HC, Harrison CM, Miller GC, Knox SA. Prevalence and patterns of multimorbidity in Australia. Medical Journal of Australia [Internet]. 2008 Jul [cited 2021 Aug 29];189(2):72–7. Available from: <https://onlinelibrary.wiley.com/doi/abs/10.5694/j.1326-5377.2008.tb01919.x>
25. Guralnik JM. Assessing the impact of comorbidity in the older population. Annals of Epidemiology [Internet]. 1996 Sep [cited 2021 Aug 29];6(5):376–80. Available from: <https://linkinghub.elsevier.com/retrieve/pii/S1047279796000609>
26. Kshatri JS, Palo SK, Bhoi T, Barik SR, Pati S. Prevalence and Patterns of Multimorbidity Among Rural Elderly: Findings of the AHSETS Study. Front Public Health [Internet]. 2020 Nov 5 [cited 2021 Aug 29];8:582663. Available from: <https://www.frontiersin.org/articles/10.3389/fpubh.2020.582663/full>
27. Irshad CV, Dash U. Healthy aging in India: evidence from a panel study. JHR [Internet]. 2021 Apr 29 [cited 2021 Aug 29];ahead-of-print(ahead-of-print). Available from: <https://www.emerald.com/insight/content/doi/10.1108/JHR-09-2020-0395/full/html>

28. Srivastava S, Joseph K J V, Dristhi D, Muhammad T. Interaction of physical activity on the association of obesity-related measures with multimorbidity among older adults: a population-based cross-sectional study in India. *BMJ Open* [Internet]. 2021 May [cited 2021 Aug 29];11(5):e050245. Available from: <https://bmjopen.bmj.com/lookup/doi/10.1136/bmjopen-2021-050245>
29. Ansari S, Muhammad T, Dhar M. How Does Multi-Morbidity Relate to Feeling of Loneliness among Older Adults? Evidence from a Population-Based Survey in India. *Population Ageing* [Internet]. 2021 Aug 3 [cited 2021 Aug 29]; Available from: <https://link.springer.com/10.1007/s12062-021-09343-5>
30. Kshatri JS, Bhoi T, Barik SR, Palo SK, Pati S. Is multimorbidity associated with risk of elder abuse? Findings from the AHSETS study. *BMC Geriatr* [Internet]. 2021 Dec [cited 2021 Aug 29];21(1):413. Available from: <https://bmcgeriatr.biomedcentral.com/articles/10.1186/s12877-021-02347-y>
31. Neale MC, Kendler KS. Models of comorbidity for multifactorial disorders. *American Journal of Human Genetics*. 1995;57(4).
32. Fried LP, Ferrucci L, Darer J, Williamson JD, Anderson G. Untangling the Concepts of Disability, Frailty, and Comorbidity: Implications for Improved Targeting and Care. Vol. 59, *Journals of Gerontology - Series A Biological Sciences and Medical Sciences*. 2004.
33. Barnett K, Mercer SW, Norbury M, Watt G, Wyke S, Guthrie B. Epidemiology of multimorbidity and implications for health care, research, and medical education: A cross-sectional study. *The Lancet*. 2012;380(9836).
34. Pathirana TI, Jackson CA. Socioeconomic status and multimorbidity: a systematic review and meta-analysis. *Australian and New Zealand Journal of Public Health* [Internet]. 2018 Apr [cited 2021 Aug 30];42(2):186–94. Available from: <https://onlinelibrary.wiley.com/doi/10.1111/1753-6405.12762>
35. Li Q, Hsia J, Yang G. Prevalence of Smoking in China in 2010. *N Engl J Med* [Internet]. 2011 Jun 23 [cited 2021 Aug 30];364(25):2469–70. Available from: <http://www.nejm.org/doi/abs/10.1056/NEJMc1102459>

36. Wang R, Yan Z, Liang Y, Tan ECK, Cai C, Jiang H, et al. Prevalence and Patterns of Chronic Disease Pairs and Multimorbidity among Older Chinese Adults Living in a Rural Area. Sergi G, editor. PLoS ONE [Internet]. 2015 Sep 22 [cited 2021 Aug 30];10(9):e0138521. Available from: <https://dx.plos.org/10.1371/journal.pone.0138521>
37. Freid VM, Bernstein AB, Bush MA. Multiple chronic conditions among adults aged 45 and over: trends over the past 10 years. NCHS data brief. 2012;(100).
38. Hosseinpoor AR, Bergen N, Mendis S, Harper S, Verdes E, Kunst A, et al. Socioeconomic inequality in the prevalence of noncommunicable diseases in low- and middle-income countries: Results from the World Health Survey. BMC Public Health. 2012;12(1).
39. Vellakkal S, Subramanian S V., Millett C, Basu S, Stuckler D, Ebrahim S. Socioeconomic Inequalities in Non-Communicable Diseases Prevalence in India: Disparities between Self-Reported Diagnoses and Standardized Measures. PLoS ONE. 2013;8(7).
40. Wolff JL, Starfield B, Anderson G. Prevalence, Expenditures, and Complications of Multiple Chronic Conditions in the Elderly. Arch Intern Med [Internet]. 2002 Nov 11 [cited 2021 Jun 24];162(20):2269. Available from: <http://archinte.jamanetwork.com/article.aspx?doi=10.1001/archinte.162.20.2269>



**Table 1** Mean score of morbidity among the older-adults in India (N=72250).

| <b>Indicators</b>    | <b>Mean Score of morbidity</b> |
|----------------------|--------------------------------|
|                      | <b>Mean (SD)</b>               |
| Overall              | 2.58 (2.19)                    |
| Multimorbidity - No  | 0.50 (0.50)                    |
| Multimorbidity - Yes | 3.79 (1.86)                    |

*Source: Authors' calculation using LASI-wave-1 data*

**Table 2** Sample distribution showing morbidity among the older-adults in India with suitable socio-demographic and economic background (N=72250).

| <b>Background</b>         | <b>Percentage (%)</b> | <b>Numbers</b> |
|---------------------------|-----------------------|----------------|
| <i>Place of Residence</i> |                       |                |
| Rural                     | 49274                 | 68.2           |
| Urban                     | 22976                 | 31.8           |
| <i>MPCE quintile</i>      |                       |                |
| Poorest                   | 14956                 | 20.7           |
| Poorer                    | 15328                 | 21.22          |
| Middle                    | 14790                 | 20.47          |
| Richer                    | 14151                 | 19.59          |
| Richest                   | 13025                 | 18.03          |

***Age at last birthday***

|                |       |       |
|----------------|-------|-------|
| ≥ 45 Years     | 9168  | 12.69 |
| 46-60 Years    | 33115 | 45.83 |
| 61-75 Years    | 24002 | 33.22 |
| Above 75 Years | 5965  | 8.26  |

***Highest level of Education***

|                         |       |       |
|-------------------------|-------|-------|
| Illiterate              | 35763 | 49.5  |
| Primary                 | 16771 | 23.21 |
| Secondary/Matriculation | 12216 | 16.91 |
| Above Secondary         | 7499  | 10.38 |

***Religion***

|        |       |       |
|--------|-------|-------|
| Hindu  | 59186 | 81.92 |
| Muslim | 8428  | 11.67 |
| Others | 4631  | 6.41  |

***Caste Category***

|                      |       |       |
|----------------------|-------|-------|
| Scheduled caste      | 13688 | 19.66 |
| Scheduled tribe      | 6102  | 8.76  |
| Other backward class | 32527 | 46.72 |
| None of them         | 17310 | 24.86 |

***Sex of Respondent***

|        |       |    |
|--------|-------|----|
| Male   | 30342 | 42 |
| Female | 41908 | 58 |

***Currently working***

|              |       |       |
|--------------|-------|-------|
| Yes          | 33431 | 46.28 |
| No           | 18884 | 26.14 |
| Never worked | 19915 | 27.57 |

***Current Marital Status***

|                   |       |       |
|-------------------|-------|-------|
| Currently married | 54621 | 75.6  |
| Widowed           | 15650 | 21.66 |
| Others            | 1975  | 2.73  |

---

|              |              |            |
|--------------|--------------|------------|
| <b>Total</b> | <b>72250</b> | <b>100</b> |
|--------------|--------------|------------|

---

*Source: Authors' calculation using LASI-wave-1 data*

**Table 3** Prevalence of morbidity (%) among the older-adults in India with suitable socio-demographic and economic background (N=72250).

| <b>Background</b> | <b>No-Morbidity</b> | <b>Single-Morbidity</b> | <b>Multimorbidity</b> |
|-------------------|---------------------|-------------------------|-----------------------|
|                   | <b>[95% C.I.]</b>   | <b>[95% C.I.]</b>       | <b>[95% C.I.]</b>     |

---

***Place of Residence***

|       |                     |                     |                     |
|-------|---------------------|---------------------|---------------------|
| Rural | 20.65 (20.07-21.23) | 19.88 (19.32-20.44) | 59.48 (58.79-60.17) |
| Urban | 14.08 (12.7-15.58)  | 16.33 (14.94-17.84) | 69.59 (67.66-71.45) |

***MPCE quintile***

|         |                     |                     |                     |
|---------|---------------------|---------------------|---------------------|
| Poorest | 24.86 (23.57-26.2)  | 21.36 (20.15-22.63) | 53.78 (52.32-55.23) |
| Poorer  | 19.79 (18.75-20.88) | 19.33 (18.29-20.42) | 60.87 (59.53-62.19) |
| Middle  | 18.13 (17.03-19.29) | 19.68 (17.98-21.5)  | 62.19 (60.42-63.92) |
| Richer  | 16.34 (14.57-18.27) | 17.68 (16.57-18.84) | 65.99 (64.08-67.85) |
| Richest | 12.82 (11.66-14.08) | 15.21 (13.98-16.54) | 71.97 (70.02-73.84) |

***Age at last birthday***

|                |                     |                     |                     |
|----------------|---------------------|---------------------|---------------------|
| ≥ 45 Years     | 30.75 (28.86-32.70) | 20.95 (19.61-22.36) | 48.31 (46.01-50.61) |
| 46-60 Years    | 21.10 (20.09-22.15) | 19.67 (18.65-20.73) | 59.23 (57.93-60.51) |
| 61-75 Years    | 12.71 (11.93-13.54) | 17.11 (16.29-17.96) | 70.18 (69.06-71.27) |
| Above 75 Years | 9.24 (7.85-10.86)   | 16.90 (14.95-19.04) | 73.86 (71.44-76.14) |

***Highest level of Education***

|            |                     |                     |                     |
|------------|---------------------|---------------------|---------------------|
| Illiterate | 20.95 (20.21-21.71) | 19.71 (18.98-20.46) | 59.34 (58.40-60.28) |
| Primary    | 16.37 (15.39-17.39) | 17.47 (16.58-18.00) | 66.17 (64.93-67.38) |

|                                 |                     |                    |               |
|---------------------------------|---------------------|--------------------|---------------|
|                                 |                     | 18.19 (16.88-      | 66.29 (64.50- |
| Secondary/Matriculation         | 15.52 (14.44-16.67) | 19.58)             | 68.03)        |
|                                 |                     | 17.98 (14.76-      | 64.99 (60.39- |
| Above Secondary                 | 17.04 (13.70-20.99) | 21.72)             | 69.32)        |
| <b><i>Religion</i></b>          |                     |                    |               |
|                                 |                     | 19.12 (18.46-      | 61.75 (60.92- |
| Hindu                           | 19.13 (18.53-19.73) | 19.80)             | 62.58)        |
|                                 |                     | 16.88 (15.15-      | 67.53 (65.10- |
| Muslim                          | 15.59 (14.02-17.00) | 18.77)             | 69.87)        |
|                                 |                     | 17.42 (15.39-      | 65.81 (61.47- |
| Others                          | 16.77 (12.44-22.23) | 19.64)             | 69.91)        |
| <b><i>Caste Category</i></b>    |                     |                    |               |
|                                 |                     | 20.24 (19.16-      | 60.30 (58.92- |
| Scheduled caste                 | 19.46 (18.39-20.58) | 21.37)             | 61.66)        |
|                                 |                     | 20.65 (19.19-      | 49.58 (47.66- |
| Scheduled tribe                 | 29.78 (28.14-31.47) | 22.18)             | 51.49)        |
|                                 |                     | 18.84 (17.76-      | 62.68 (61.21- |
| Other backward class            | 18.48 (17.37-19.63) | 19.98)             | 64.13)        |
|                                 |                     | 17.01 (16.16-      | 68.6 (67.53-  |
| None of them                    | 14.39 (13.60-15.22) | 17.89)             | 69.66)        |
| <b><i>Sex of Respondent</i></b> |                     |                    |               |
|                                 |                     |                    | 62.30 (61.20- |
| Male                            | 18.3 (17.53-19.09)  | 19.4 (18.58-20.25) | 63.38)        |
|                                 |                     | 18.29 (17.46-      | 62.95 (61.85- |
| Female                          | 18.76 (17.89-19.66) | 19.15)             | 64.03)        |

***Currently working***

|              |                     |               |               |
|--------------|---------------------|---------------|---------------|
|              |                     | 20.63 (19.83- | 55.96 (54.83- |
| Yes          | 23.42 (22.59-24.27) | 21.45)        | 57.07)        |
|              |                     | 16.74 (15.79- | 72.15 (70.91- |
| No           | 11.12 (10.28-12.02) | 17.73)        | 73.35)        |
|              |                     | 17.52 (16.11- | 65.03 (63.20- |
| Never worked | 17.45 (15.99-19.02) | 19.01)        | 66.82)        |

***Current Marital Status***

|                   |                     |               |               |
|-------------------|---------------------|---------------|---------------|
|                   |                     | 19.33 (18.62- | 60.92 (60.04- |
| Currently married | 19.75 (19.14-20.38) | 20.06)        | 61.78)        |
|                   |                     | 16.96 (15.89- | 69.51 (67.98- |
| Widowed           | 13.53 (12.45-14.69) | 18.08)        | 71.00)        |
|                   |                     | 17.09 (14.08- | 57.08 (48.73- |
| Others            | 25.83 (17.03-37.15) | 20.59)        | 65.04)        |

---

|              |                            |                            |                            |
|--------------|----------------------------|----------------------------|----------------------------|
| <b>Total</b> | <b>18.57 (17.96-19.19)</b> | <b>18.75 (18.16-19.36)</b> | <b>62.68 (61.90-63.45)</b> |
|--------------|----------------------------|----------------------------|----------------------------|

---

*Source: Authors' calculation using LASI-wave-1 data*

**Table 4** Regression analysis result showing the associated risk factors of multimorbidity among the older-adults in India (N=72250).

|                                  | <b>Adjusted Odds Ratio</b> | <b>Confidence Interval [95%]</b> |
|----------------------------------|----------------------------|----------------------------------|
| Background                       |                            |                                  |
| <b><i>Place of Residence</i></b> |                            |                                  |

Rural®

Urban 1.408††† [1.355,1.46]

***MPCE quintile***

Poorest®

Poorer 1.244††† [1.183,1.307]

Middle 1.375††† [1.313,1.452]

Richer 1.629††† [1.55,1.719]

Richest 1.932††† [1.824,2.032]

***Age at last birthday***

≥ 45 Years®

46-60 Years 1.971††† [1.875,2.072]

61-75 Years 3††† [2.831,3.178]

Above 75 Years 3.325††† [3.05,3.624]

***Highest level of Education***

Illiterate®

Primary 1.34††† [1.285,1.398]

Secondary/Matriculation 1.321††† [1.258,1.387]

Above Secondary 1.202††† [1.127,1.283]

***Religion***

Hindu®

Muslim 1.307††† [1.237,1.382]

Others 1.207††† [1.146,1.272]

### ***Caste Category***

Scheduled caste®

|                      |          |               |
|----------------------|----------|---------------|
| Scheduled tribe      | 0.884††† | [0.839,0.932] |
| Other backward class | 0.564††† | [0.533,0.596] |
| None of them         | 0.857††† | [0.821,0.894] |

### ***Sex of Respondent***

Male®

|        |         |               |
|--------|---------|---------------|
| Female | 1.34††† | [1.282,1.401] |
|--------|---------|---------------|

### ***Currently working***

Yes®

|              |          |               |
|--------------|----------|---------------|
| No           | 1.489††† | [1.423,1.558] |
| Never worked | 1.124††† | [1.075,1.175] |

### ***Current Marital Status***

Currently married®

|         |         |               |
|---------|---------|---------------|
| Widowed | 1.08††† | [1.03,1.131]  |
| Others  | 0.946   | [0.863,1.037] |

### ***Alcohol consumption (ever)***

No®

|     |          |              |
|-----|----------|--------------|
| Yes | 1.195††† | [1.14,1.254] |
|-----|----------|--------------|

***Source:*** Authors' calculation using *LASI-wave-1* data

***Note:*** 95% confidence interval in the parentheses; Significant level at: ††† significant at 1 percent and †† significant at 5 percent; ® is the reference category of the independent variables.





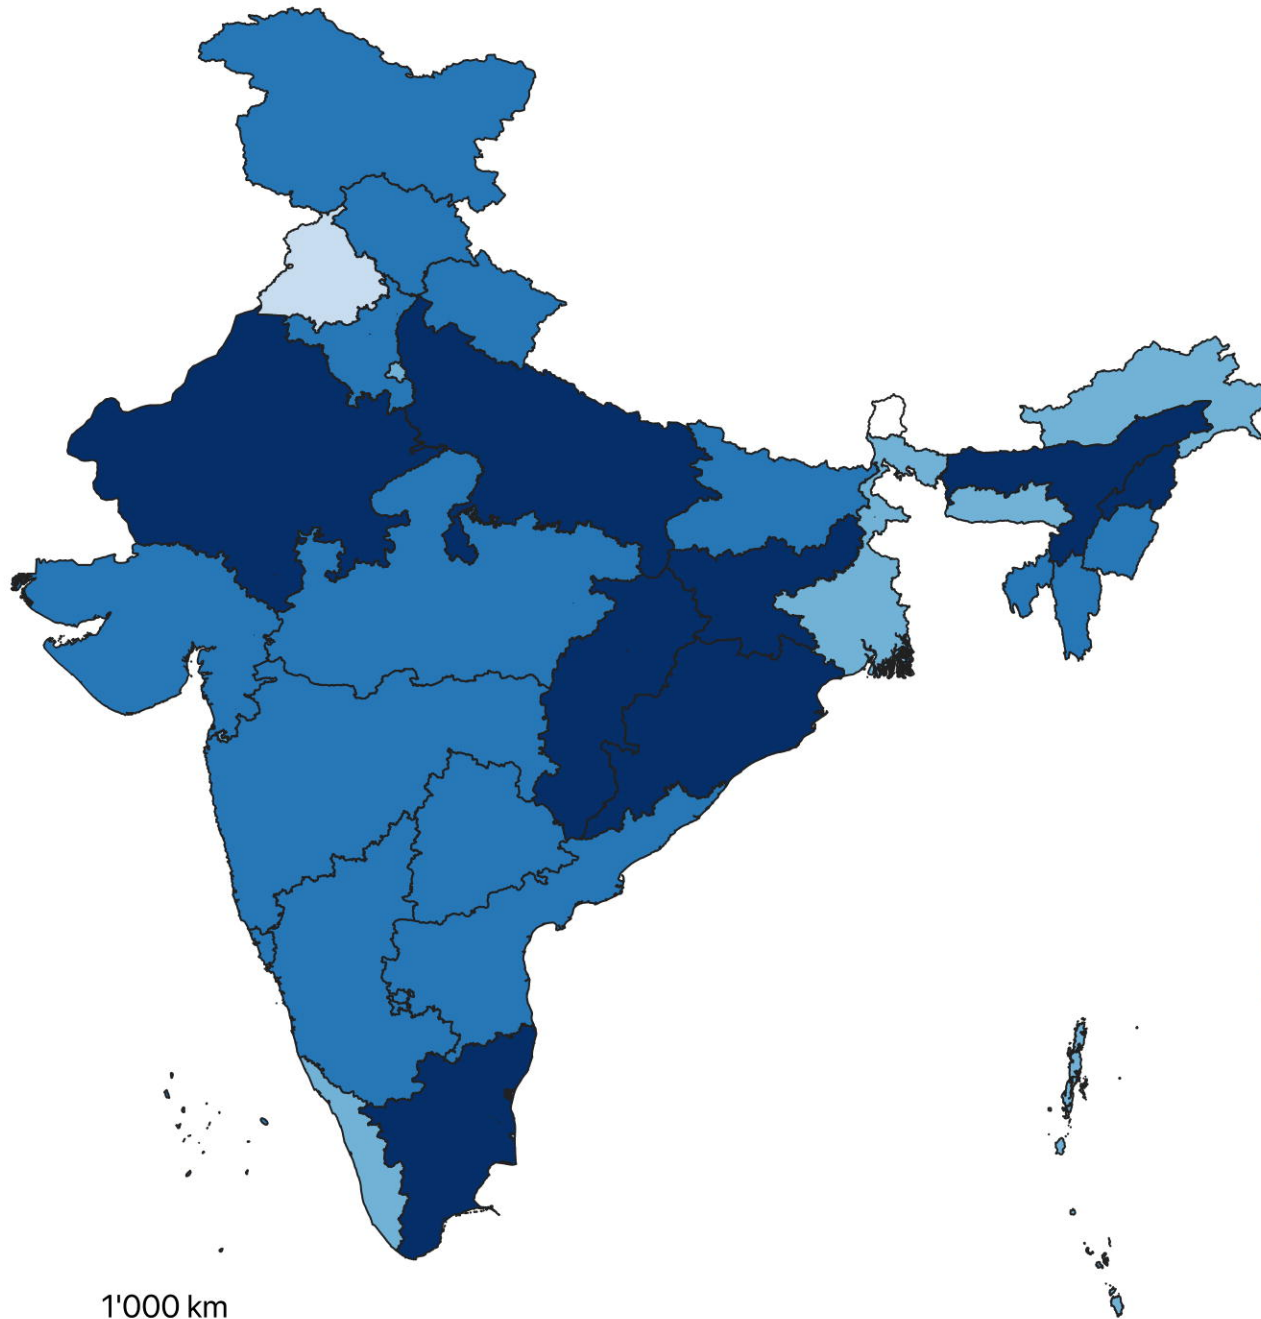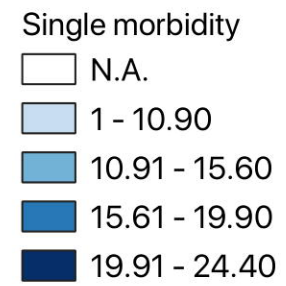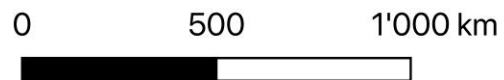

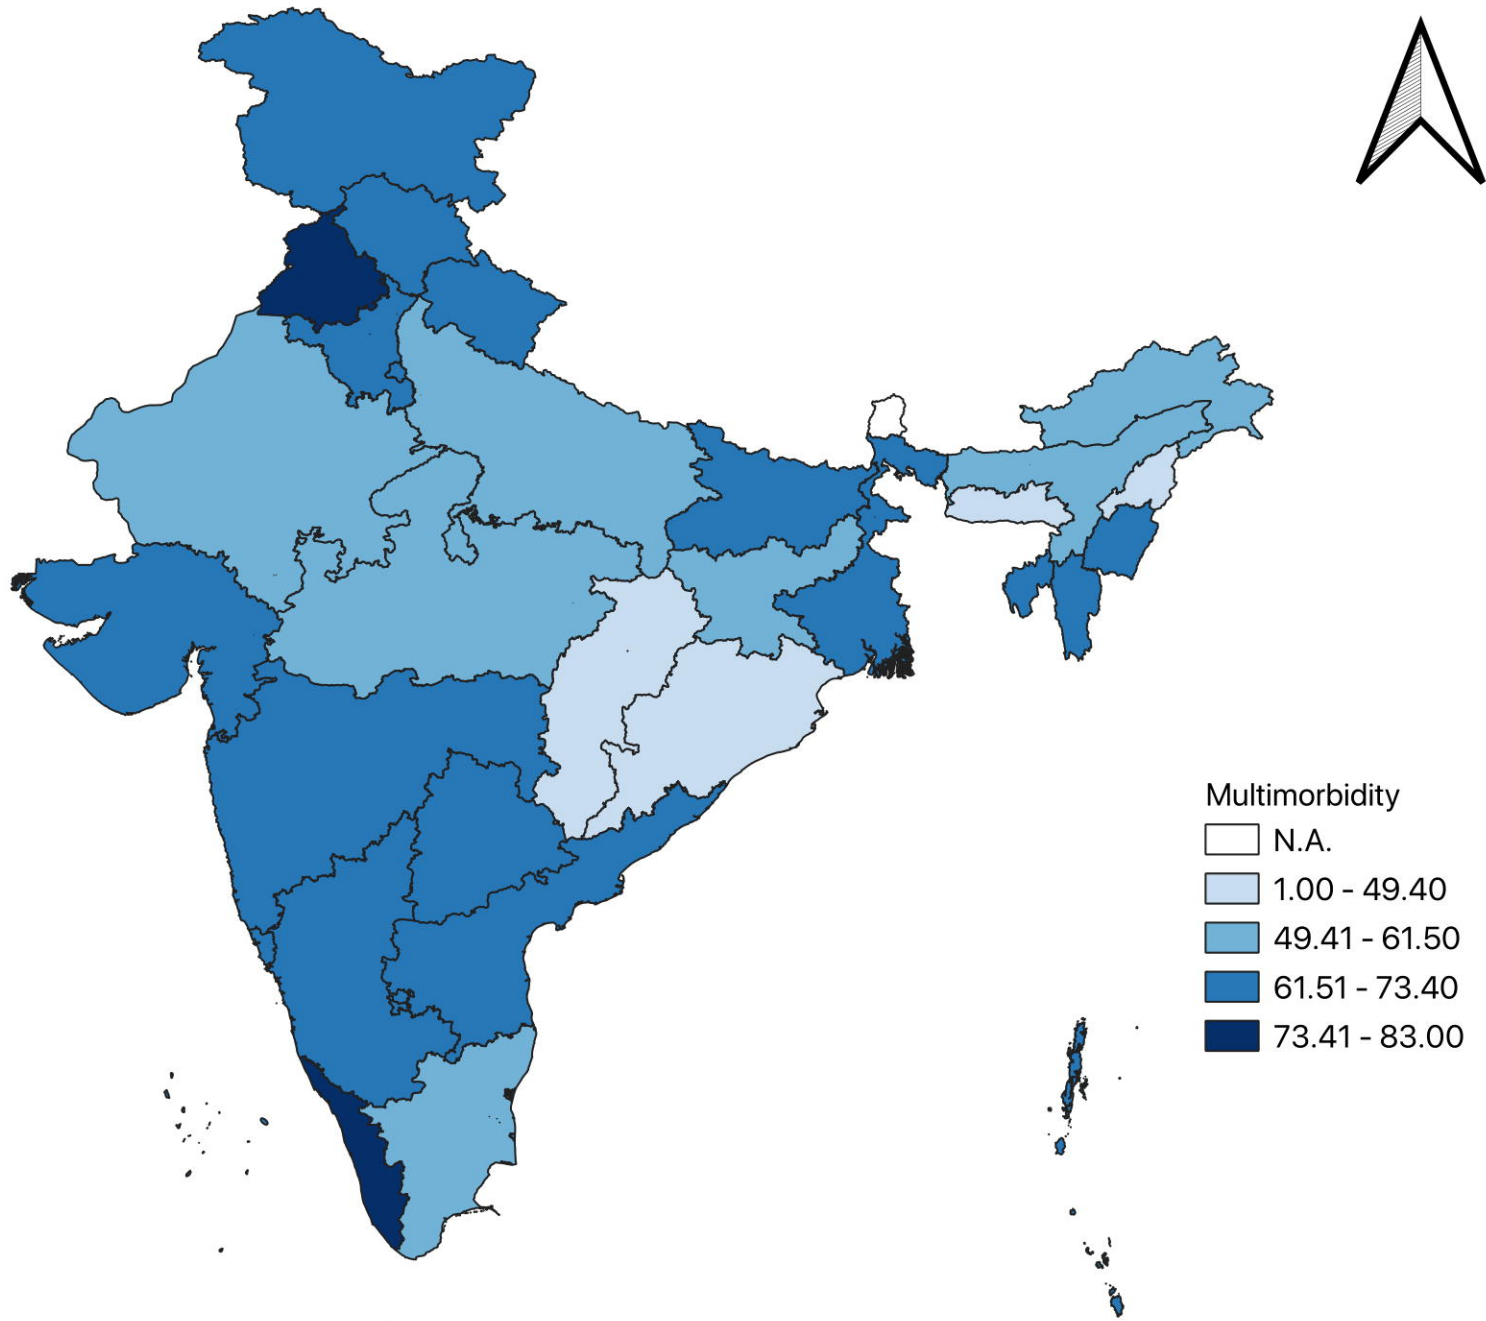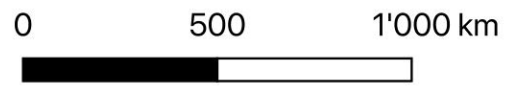

Source: https://medrxiv.org/content/10.1101/2021.11.12.21265083v1.full.pdf
